# Supplementary material
Source: publisher figshare collection journal article supplement (https://karger.figshare.com/articles/dataset/_/14929479)
Supplement: Supplementary file 1 [file 1]

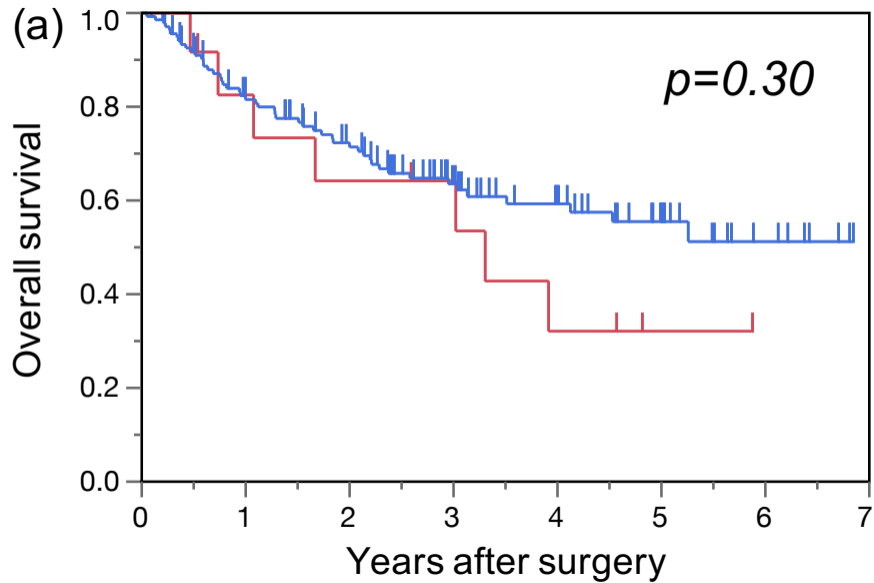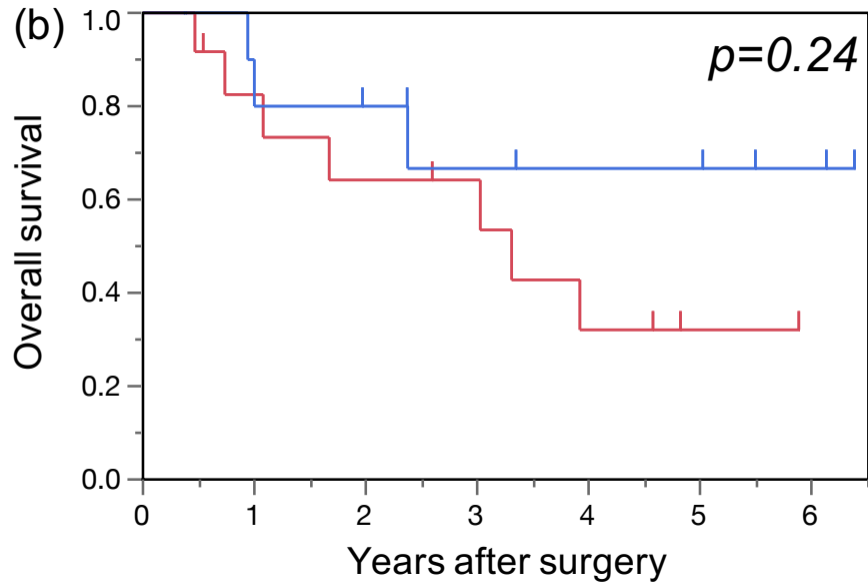

Figure S1. Kaplan-Meier estimates of overall survival between metastatic group patients and non- metastatic group patients (a) before (entire cohort) and (b) after propensity score matching (matched cohort). Red line showed metastatic group, and blue line showed non-metastatic group.
